# Supplementary material for: Carbon doped molybdenum disulfide nanosheets stabilized on graphene for the hydrogen evolution reaction with high electrocatalytic ability
Source: Royal Society of Chemistry journal article supplement (doi:10.1039/c5nr07370g), 2015-12-10

## Supporting information

### Carbon doped molybdenum disulfide nanosheets stabilized on graphene for hydrogen evolution reaction with high electrocatalytic ability

Yong Li, Jiao Wang, Xike Tian\*, Longlong Ma, Chu Dai, Chao Yang, Zhaoxin Zhou

Faculty of Materials Science and Chemistry, China University of Geosciences, Wuhan 430074,  
PR China

\*Corresponding author. Email address: xktian@cug.edu.cn; Tel.: +86 027 67883739

#### Figure captions:

**Fig. S1** XRD patterns of GO (a), and XRD patterns of C/MoS<sub>2</sub>@G<sub>1</sub> (I), C/MoS<sub>2</sub>@G<sub>2</sub> (II), C/MoS<sub>2</sub>@G<sub>3</sub> (III) and C/MoS<sub>2</sub>@G<sub>4</sub> (IV) (b).

**Fig. S2** FESEM images of C/MoS<sub>2</sub>@G<sub>1</sub>, C/MoS<sub>2</sub>@G<sub>2</sub>, C/MoS<sub>2</sub>@G<sub>3</sub> and C/MoS<sub>2</sub>@G<sub>4</sub>.

**Fig. S3** TEM images of graphene (a), C/MoS<sub>2</sub>@G<sub>1</sub> (b), C/MoS<sub>2</sub>@G<sub>2</sub> (c), C/MoS<sub>2</sub>@G<sub>3</sub> (d) and C/MoS<sub>2</sub>@G<sub>4</sub> (e).

**Fig. S4** Polarization curves of C/MoS<sub>2</sub>@G<sub>1</sub>, C/MoS<sub>2</sub>@G<sub>2</sub>, C/MoS<sub>2</sub>@G<sub>3</sub> and C/MoS<sub>2</sub>@G<sub>4</sub> nanohybrids.

**Fig. S1** XRD patterns of GO (a), and XRD patterns of C/MoS<sub>2</sub>@G<sub>1</sub> (I), C/MoS<sub>2</sub>@G<sub>2</sub> (II), C/MoS<sub>2</sub>@G<sub>3</sub> (III) and C/MoS<sub>2</sub>@G<sub>4</sub> (IV) (b).

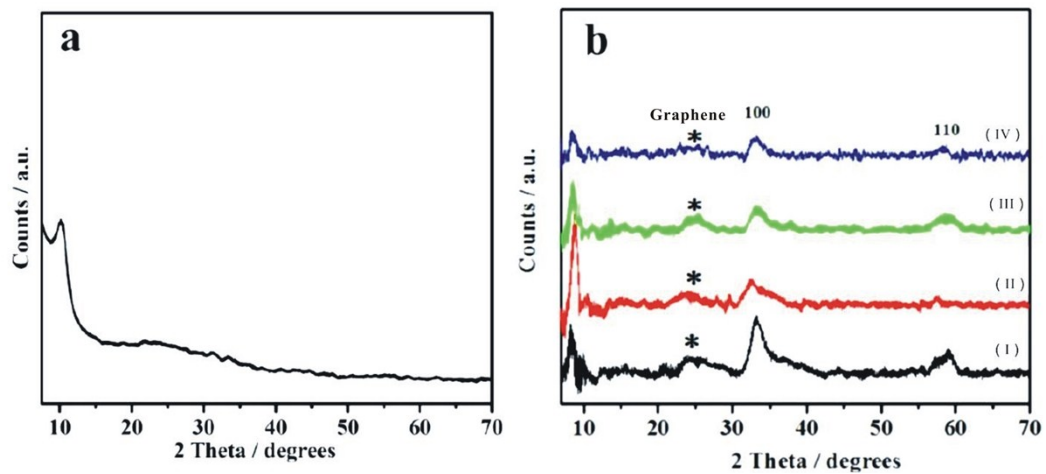

**Fig. S2** FESEM images of C/MoS<sub>2</sub>@G<sub>1</sub>, C/MoS<sub>2</sub>@G<sub>2</sub>, C/MoS<sub>2</sub>@G<sub>3</sub> and C/MoS<sub>2</sub>@G<sub>4</sub>.

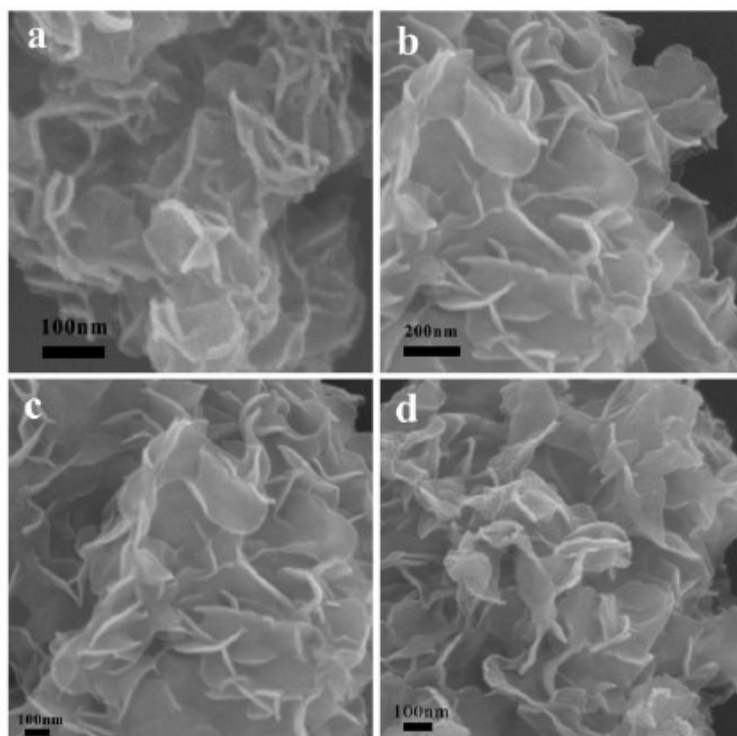

**Fig. S3** TEM images of graphene (a), C/MoS<sub>2</sub>@G<sub>1</sub> (b), C/MoS<sub>2</sub>@G<sub>2</sub> (c), C/MoS<sub>2</sub>@G<sub>3</sub> (d) and C/MoS<sub>2</sub>@G<sub>4</sub> (e).

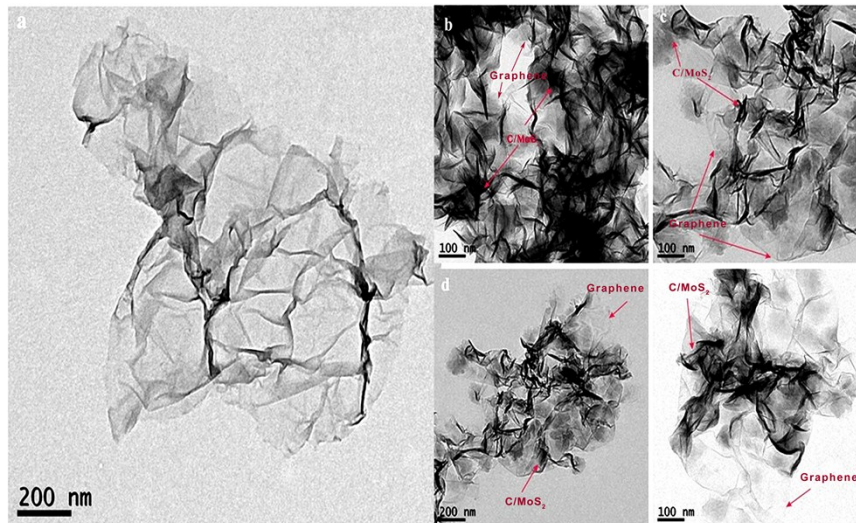

**Fig. S4** Polarization curves of C/MoS<sub>2</sub>@G<sub>1</sub>, C/MoS<sub>2</sub>@G<sub>2</sub>, C/MoS<sub>2</sub>@G<sub>3</sub> and C/MoS<sub>2</sub>@G<sub>4</sub> nanohybrids.

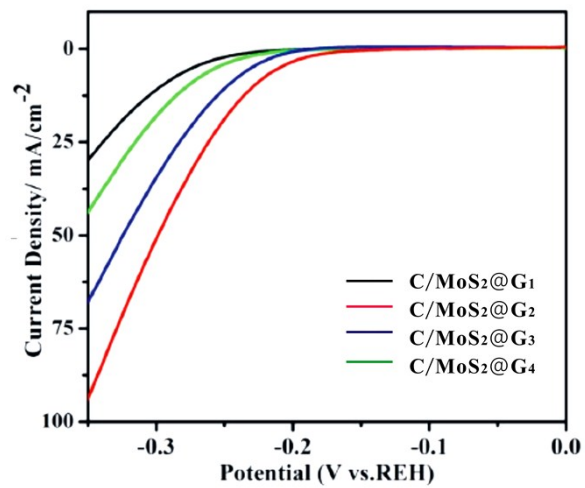

Supplement: c5nr07370g1.pdf [file c5nr07370g1.pdf]
